# Supplementary material for: Mortality in a cohort of 3.1 million children, adolescents and young adults
Source: PubMed Central journal article supplement — J Epidemiol Community Health. 2020 Jan 8;74(3):260–8. doi: 10.1136/jech-2019-213365 (PMC7035693; doi:10.1136/jech-2019-213365), 2020-01-08
Supplement: jech-2019-213365supp001.pdf [file jech-2019-213365supp001.pdf]

## Supplemental file 1. Variables used to define cohort inclusion and exclusion criteria, study exposures, outcomes and covariates.

| Assessment                 | Timing                                                         | Disease, procedure or condition                                                                                                                                                                                                                                                                                                                | DAD/MOMBABY, SDS, OMHRS & NACRS fields and ICD-9 [10-CA] diagnostic codes                                                                                                                                                                                     | Other sources                                                                                                        |
|----------------------------|----------------------------------------------------------------|------------------------------------------------------------------------------------------------------------------------------------------------------------------------------------------------------------------------------------------------------------------------------------------------------------------------------------------------|---------------------------------------------------------------------------------------------------------------------------------------------------------------------------------------------------------------------------------------------------------------|----------------------------------------------------------------------------------------------------------------------|
| <b>Inclusion criteria</b>  | At the time of the index birth                                 | Obstetrical live birth delivery in Ontario, Canada, between April 1, 1990 and March 31, 2016                                                                                                                                                                                                                                                   | DAD/MOMBABY (see link at <a href="https://datadictionary.ices.on.ca/Applications/DataDictionary/Library.aspx?Library=MOMBABY">https://datadictionary.ices.on.ca/Applications/DataDictionary/Library.aspx?Library=MOMBABY</a> )<br>Livebirth: M_STILLBIRTH='F' | --                                                                                                                   |
| <b>Exclusion criteria</b>  | At the time of the index birth                                 | a. Invalid healthcare number for the mother or the child in MOMBABY<br>b. Invalid or missing maternal age, sex, or birth date<br>c. Invalid or missing child age, sex or birth date<br>d. Invalid maternal death date (precedes delivery date)<br>e. Maternal age < 16 or > 50 years<br>f. Gestational weeks at birth is < 20 weeks or missing | DAD/MOMBABY                                                                                                                                                                                                                                                   | RPDB (contains demographic information & encrypted healthcare numbers for all individuals eligible for OHIP)         |
|                            | Age 366 days                                                   | Child not an Ontario resident                                                                                                                                                                                                                                                                                                                  | --                                                                                                                                                                                                                                                            | RPDB                                                                                                                 |
|                            | Same                                                           | Child not alive                                                                                                                                                                                                                                                                                                                                | --                                                                                                                                                                                                                                                            | RPDB                                                                                                                 |
|                            | Same                                                           | Child not eligible for OHIP                                                                                                                                                                                                                                                                                                                    | --                                                                                                                                                                                                                                                            | RPDB                                                                                                                 |
| <b>Main exposure</b>       | At the index birth                                             | Infant sex (male, female)                                                                                                                                                                                                                                                                                                                      | DAD/MOMBABY                                                                                                                                                                                                                                                   | --                                                                                                                   |
| <b>Secondary exposures</b> | Same                                                           | Maternal number of previous livebirths (0, 1, 2, ≥ 3, missing)                                                                                                                                                                                                                                                                                 | DAD/MOMBABY                                                                                                                                                                                                                                                   | --                                                                                                                   |
|                            | Same                                                           | Maternal world region of origin (Caribbean, East Asia/Pacific, Hispanic America, Middle East/North Africa, South Asia, Sub-Saharan Africa, Western Nations/Europe, vs. Canada/long-term resident)                                                                                                                                              | --                                                                                                                                                                                                                                                            | IRCC Permanent Resident Database (contains data on country of citizenship for immigrants to Canada from 1985 onward) |
|                            | At age 366 days of the child, time-varying at each year of age | Area-level income quintile of child (1 [lowest], 2, 3, 4, 5 [highest], missing)                                                                                                                                                                                                                                                                | --                                                                                                                                                                                                                                                            | Statistics Canada census data                                                                                        |
|                            | Same                                                           | Rural residency of child (urban, rural, missing)                                                                                                                                                                                                                                                                                               | --                                                                                                                                                                                                                                                            | Statistics Canada census data                                                                                        |
| <b>Main outcome</b>        | From age 1 to 24 years                                         | Child/adolescent all-cause mortality, from April 1, 1991 to March 31, 2018                                                                                                                                                                                                                                                                     | --                                                                                                                                                                                                                                                            | RPDB                                                                                                                 |

| Assessment                | Timing                         | Disease, procedure or condition                                                                                                                                                                                            | DAD/MOMBABY, SDS, OMHRS & NACRS fields and ICD-9 [10-CA] diagnostic codes                                                 | Other sources                                                                                                                                          |
|---------------------------|--------------------------------|----------------------------------------------------------------------------------------------------------------------------------------------------------------------------------------------------------------------------|---------------------------------------------------------------------------------------------------------------------------|--------------------------------------------------------------------------------------------------------------------------------------------------------|
| <b>Secondary outcomes</b> | Same                           | Child/adolescent death due to injury*                                                                                                                                                                                      | --                                                                                                                        | ORGD: ICD-9 COD<br>E950-E959, E960-E969, E800-E849, E850-E854, E855-E949, E970-E999, 800-999                                                           |
|                           | Same                           | Type of child/adolescent injury death*:<br>a. <i>Intentional self-harm</i><br>b. <i>Assault/homicide</i><br>c. <i>Transport accident</i><br>d. <i>Accidental poisoning/overdose</i><br>e. <i>Other/Undetermined intent</i> | --                                                                                                                        | ORGD: ICD-9 COD<br>a. <i>E950-E959</i><br>b. <i>E960-E969</i><br>c. <i>E800-E849</i><br>d. <i>E850-E854</i><br>e. <i>E855-E949, E970-E999, 800-999</i> |
|                           | Same                           | Child/adolescent death arising out of hospital (any death not occurring in DAD, SDS, OMHRS, NACRS or OHIP)                                                                                                                 | No discharge disposition of 'Died' n DAD, SDS, OMHRS or NACRS within +/-1 day of the date of death in RPDB                | OHIP physician billing with an emergency department or inpatient location code, within +/- 1 day of the date of death in RPDB                          |
| <b>Covariates</b>         | At the time of the index birth | Maternal age                                                                                                                                                                                                               | --                                                                                                                        | RPDB                                                                                                                                                   |
|                           | Same                           | Maternal number of previous livebirths (0, 1, 2, ≥ 3, missing)                                                                                                                                                             | DAD/MOMBABY                                                                                                               | --                                                                                                                                                     |
|                           | Same                           | Maternal world region of origin (Caribbean, East Asia/Pacific, Hispanic America, Middle East/North Africa, South Asia, Sub-Saharan Africa, Western Nations/Europe, vs. Canada/long-term resident)                          | --                                                                                                                        | IRCC                                                                                                                                                   |
|                           | Same                           | Child year of birth                                                                                                                                                                                                        | DAD/MOMBABY                                                                                                               | --                                                                                                                                                     |
|                           | Same                           | Child sex (male, female)                                                                                                                                                                                                   | DAD/MOMBABY                                                                                                               | --                                                                                                                                                     |
|                           | Same                           | Child birthweight                                                                                                                                                                                                          | DAD/MOMBABY                                                                                                               | --                                                                                                                                                     |
|                           | Same                           | Child multi-gestational birth                                                                                                                                                                                              | DAD/MOMBABY                                                                                                               |                                                                                                                                                        |
|                           | Same                           | Child born premature at < 37 completed weeks' gestation                                                                                                                                                                    | DAD/MOMBABY<br><u>Pre-2002</u> : 644.2, 765 [O60, P07.2, P07.3]<br><u>As of 2002</u> : Gestational weeks < 37 at delivery | --                                                                                                                                                     |

| Assessment | Timing                                                         | Disease, procedure or condition                                                  | DAD/MOMBABY, SDS, OMHRS & NACRS fields and ICD-9 [10-CA] diagnostic codes                              | Other sources                                                                                                                                                             |
|------------|----------------------------------------------------------------|----------------------------------------------------------------------------------|--------------------------------------------------------------------------------------------------------|---------------------------------------------------------------------------------------------------------------------------------------------------------------------------|
|            | Between the index birth and age 365 days                       | Any congenital or chromosomal anomaly in the child within the first year of life | 741, 742, 743, 744, 745, 746, 747, 748, 749, 750, 751, 752, 753, 754, 755, 756, 757, 758, 759, 760 [Q] | OHIP ICD-9 diagnostic code 741, 742, 743, 744, 745, 746, 747, 748, 749, 750, 751, 752, 753, 754, 755, 756, 758, 759 <b>and</b> billed by a Pediatrician (OHIP feecode 26) |
|            | At age 366 days of the child, time-varying at each year of age | Area-level income quintile of child (1 [lowest], 2, 3, 4, 5 [highest], missing)  | --                                                                                                     | Statistics Canada census data                                                                                                                                             |
|            | Same                                                           | Rural residency of child (urban, rural, missing)                                 | --                                                                                                     | Statistics Canada census data                                                                                                                                             |

CIHI Canadian Institute for Health Information; DAD Discharge Abstract Database; ICD-9 International Classification of Diseases, 9th Revision; ICD-10-CA International Classification of Diseases, 10th Revision, Canada; IRCC Immigration, Refugees and Citizenship Canada; NACRS National Ambulatory Care Reporting System; OHIP Ontario Health Insurance Plan; SDS Same Day Surgery Database; RPDB Registered Persons Database; OMHRS Ontario Mental Health Reporting System; ORGD Office of the Registrar General – Deaths

\*Cause of death in ORGD is available up to December 2016 only.
