# Supplementary material for: Mortality in a cohort of 3.1 million children, adolescents and young adults
Source: PubMed Central journal article supplement — J Epidemiol Community Health. 2020 Jan 8;74(3):260–8. doi: 10.1136/jech-2019-213365 (PMC7035693; doi:10.1136/jech-2019-213365), 2020-01-08
Supplement: jech-2019-213365supp003.pdf [file jech-2019-213365supp003.pdf]

## Supplementary file 3. STROBE checklist.

| Section/Topic                | Item # | Recommendation                                                                                                                                                                       | Reported on page # |
|------------------------------|--------|--------------------------------------------------------------------------------------------------------------------------------------------------------------------------------------|--------------------|
| Title and abstract           | 1      | (a) Indicate the study's design with a commonly used term in the title or the abstract                                                                                               | 2                  |
|                              |        | (b) Provide in the abstract an informative and balanced summary of what was done and what was found                                                                                  | 2                  |
| <b>Introduction</b>          |        |                                                                                                                                                                                      |                    |
| Background/rationale         | 2      | Explain the scientific background and rationale for the investigation being reported                                                                                                 | 3                  |
| Objectives                   | 3      | State specific objectives, including any prespecified hypotheses                                                                                                                     | 3                  |
| <b>Methods</b>               |        |                                                                                                                                                                                      |                    |
| Study design                 | 4      | Present key elements of study design early in the paper                                                                                                                              | 3                  |
| Setting                      | 5      | Describe the setting, locations, and relevant dates, including periods of recruitment, exposure, follow-up, and data collection                                                      | 3,4                |
| Participants                 | 6      | (a) Give the eligibility criteria, and the sources and methods of selection of participants. Describe methods of follow-up                                                           | 3,4                |
|                              |        | (b) For matched studies, give matching criteria and number of exposed and unexposed                                                                                                  | NA                 |
| Variables                    | 7      | Clearly define all outcomes, exposures, predictors, potential confounders, and effect modifiers. Give diagnostic criteria, if applicable                                             | 4,5                |
| Data sources/<br>measurement | 8*     | For each variable of interest, give sources of data and details of methods of assessment (measurement). Describe comparability of assessment methods if there is more than one group | 4,5                |
| Bias                         | 9      | Describe any efforts to address potential sources of bias                                                                                                                            | 5                  |
| Study size                   | 10     | Explain how the study size was arrived at                                                                                                                                            | 5                  |
| Quantitative variables       | 11     | Explain how quantitative variables were handled in the analyses. If applicable, describe which groupings were chosen and why                                                         | 4,5                |
| Statistical methods          | 12     | (a) Describe all statistical methods, including those used to control for confounding                                                                                                | 4,5                |
|                              |        | (b) Describe any methods used to examine subgroups and interactions                                                                                                                  | 4,5                |
|                              |        | (c) Explain how missing data were addressed                                                                                                                                          | 4,5, Tables 2-4    |
|                              |        | (d) If applicable, explain how loss to follow-up was addressed                                                                                                                       |                    |
|                              |        | (e) Describe any sensitivity analyses                                                                                                                                                | 5                  |
| <b>Results</b>               |        |                                                                                                                                                                                      |                    |

|                          |     |                                                                                                                                                                                                              |                                                              |
|--------------------------|-----|--------------------------------------------------------------------------------------------------------------------------------------------------------------------------------------------------------------|--------------------------------------------------------------|
| Participants             | 13* | (a) Report numbers of individuals at each stage of study—eg numbers potentially eligible, examined for eligibility, confirmed eligible, included in the study, completing follow-up, and analysed            | 5,6                                                          |
|                          |     | (b) Give reasons for non-participation at each stage                                                                                                                                                         | NA                                                           |
|                          |     | (c) Consider use of a flow diagram                                                                                                                                                                           | Supplemental file 3                                          |
| Descriptive data         | 14* | (a) Give characteristics of study participants (eg demographic, clinical, social) and information on exposures and potential confounders                                                                     | Table 1 and page 6                                           |
|                          |     | (b) Indicate number of participants with missing data for each variable of interest                                                                                                                          | Table 1                                                      |
|                          |     | (c) Summarise follow-up time (eg, average and total amount)                                                                                                                                                  | 6                                                            |
| Outcome data             | 15* | Report numbers of outcome events or summary measures over time                                                                                                                                               | Figure 1                                                     |
| Main results             | 16  | (a) Give unadjusted estimates and, if applicable, confounder-adjusted estimates and their precision (eg, 95% confidence interval). Make clear which confounders were adjusted for and why they were included | Pages 6 and 7, Tables 2 and 3                                |
|                          |     | (b) Report category boundaries when continuous variables were categorized                                                                                                                                    | Pages 6 and 7, Figure 1                                      |
|                          |     | (c) If relevant, consider translating estimates of relative risk into absolute risk for a meaningful time period                                                                                             |                                                              |
| Other analyses           | 17  | Report other analyses done—eg analyses of subgroups and interactions, and sensitivity analyses                                                                                                               | Tables 2 and 3<br>Figure 2-5<br>Supplemental files 4a and 4b |
| <b>Discussion</b>        |     |                                                                                                                                                                                                              |                                                              |
| Key results              | 18  | Summarise key results with reference to study objectives                                                                                                                                                     | 7,8                                                          |
| <b>Limitations</b>       |     |                                                                                                                                                                                                              |                                                              |
| Interpretation           | 20  | Give a cautious overall interpretation of results considering objectives, limitations, multiplicity of analyses, results from similar studies, and other relevant evidence                                   | 8,9                                                          |
| Generalisability         | 21  | Discuss the generalisability (external validity) of the study results                                                                                                                                        | 9,10                                                         |
| <b>Other information</b> |     |                                                                                                                                                                                                              |                                                              |
| Funding                  | 22  | Give the source of funding and the role of the funders for the present study and, if applicable, for the original study on which the present article is based                                                | 11                                                           |
