# Supplementary material for: Mortality in a cohort of 3.1 million children, adolescents and young adults
Source: PubMed Central journal article supplement — J Epidemiol Community Health. 2020 Jan 8;74(3):260–8. doi: 10.1136/jech-2019-213365 (PMC7035693; doi:10.1136/jech-2019-213365), 2020-01-08

**Supplemental file 4a. Proportion of the 3430 deaths with a known cause that were specifically due to injury, among Canadian males aged 1 to 24 years.** Shown on the Y-axis are age-specific proportions and 95% confidence intervals (CI) for injury-related deaths. Below the X-axis is a breakdown of deaths due to injury, by injury sub-types, from ages 1 to 14 years (left pie chart), and 15 to 24 years (right pie chart).

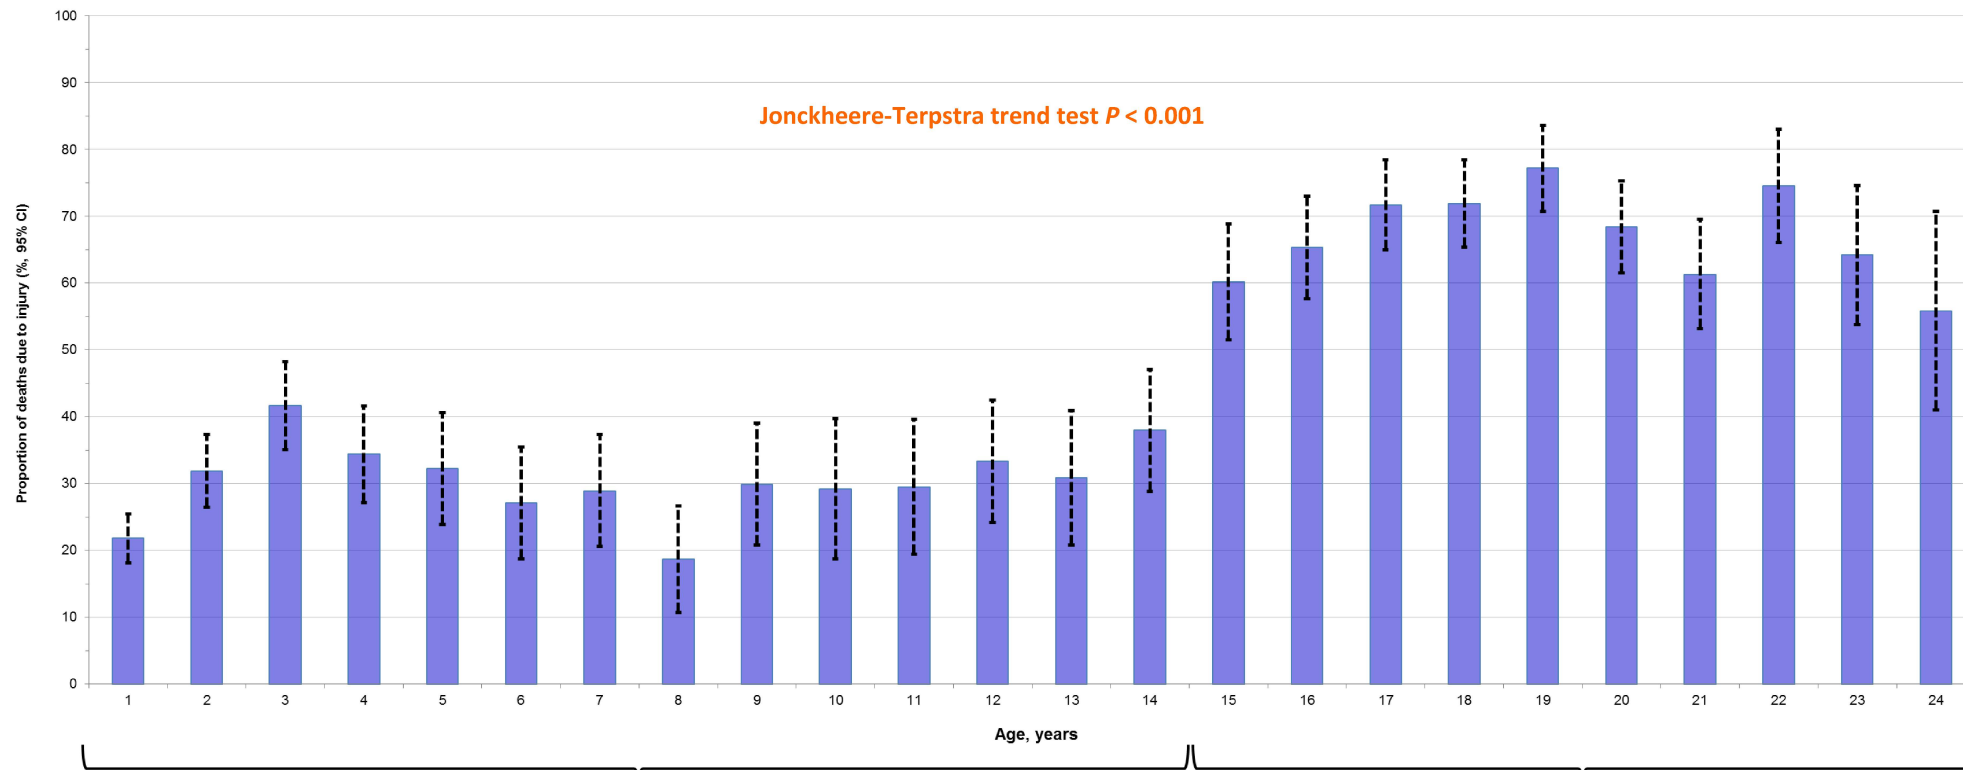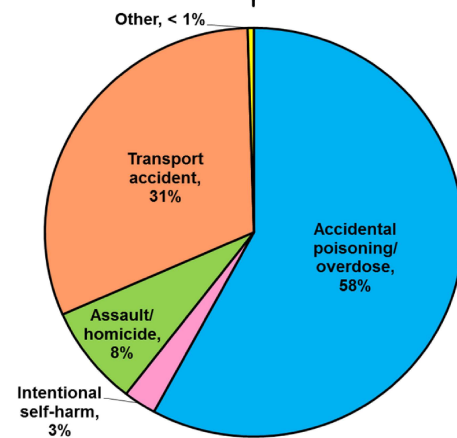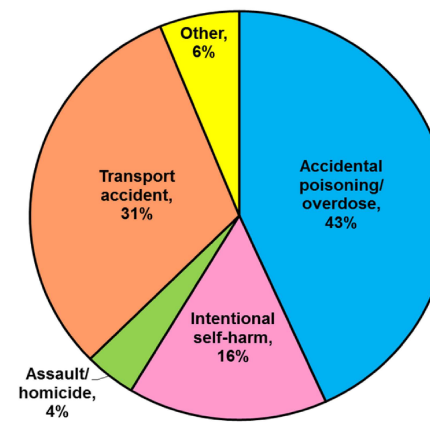

**Supplemental file 4b. Proportion of the 2218 deaths with a known cause that were specifically due to injury, among Canadian females aged 1 to 24 years.** Shown on the Y-axis are age-specific proportions and 95% confidence intervals (CI) for injury-related deaths. Below the X-axis is a breakdown of deaths due to injury, by injury sub-types, from ages 1 to 14 years (left pie chart), and 15 to 24 years (right pie chart).

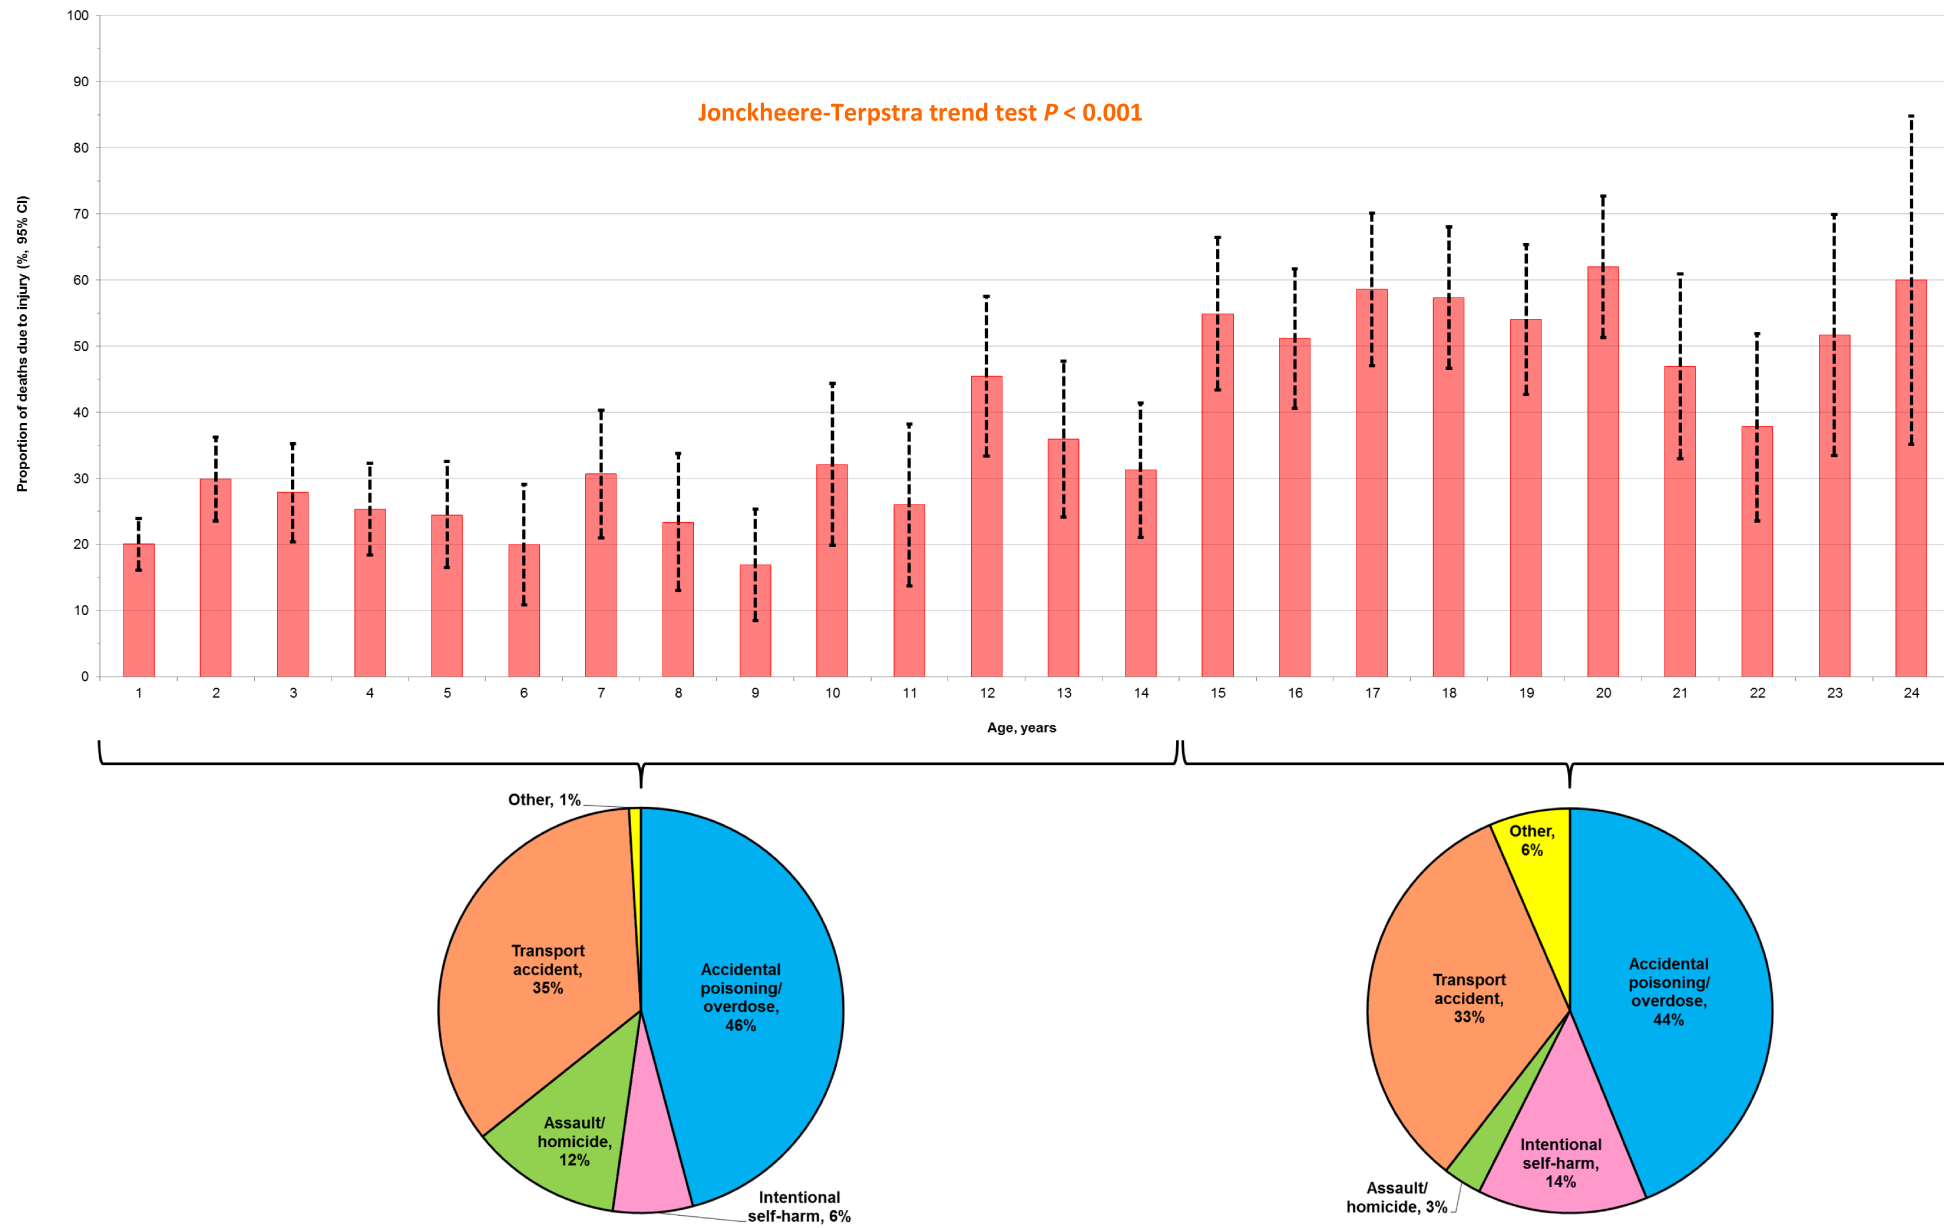

Supplement: jech-2019-213365supp004.pdf [file jech-2019-213365supp004.pdf]
