# Supplementary figures and images for: Mortality in a cohort of 3.1 million children, adolescents and young adults
Source: PubMed Central journal article supplement — J Epidemiol Community Health. 2020 Jan 8;74(3):260–8. doi: 10.1136/jech-2019-213365 (PMC7035693; doi:10.1136/jech-2019-213365), 2020-01-08

**Supplemental file 2. Cohort creation**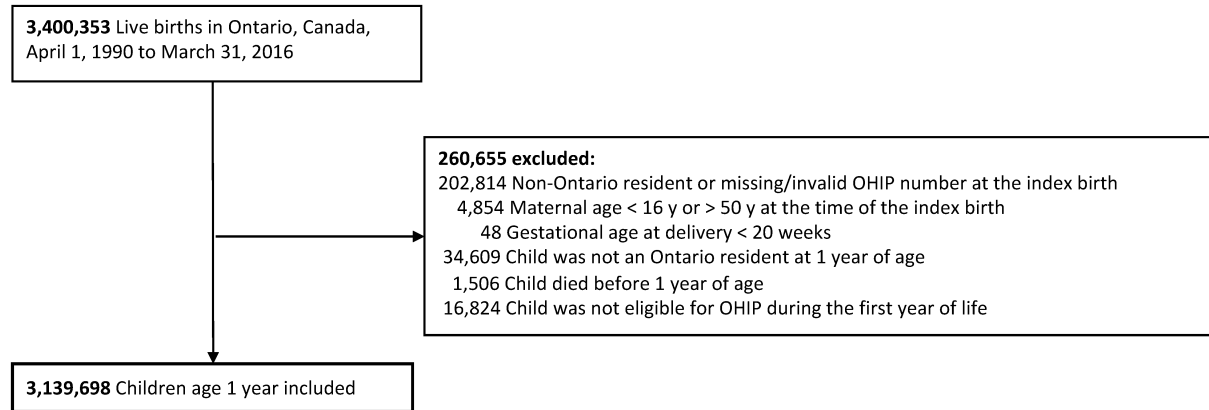

Supplement: jech-2019-213365supp002.pdf [file jech-2019-213365supp002.pdf]
